# Supplementary material
Source: PubMed Central journal article supplement (PMC3687785)
Supplement: NIHMS479614-supplement-jne466199suppdata_pdf.pdf [file NIHMS479614-supplement-jne466199suppdata_pdf.pdf]

**Laminar stream of detergents for subcellular neurite damage in a  
microfluidic device: A simple tool for the study of  
neuroregeneration**

Chang Young Lee<sup>a,b</sup>, Elena V. Romanova<sup>b</sup>, and Jonathan V. Sweedler<sup>b\*</sup>

<sup>a</sup>School of Nano-Bioscience and Chemical Engineering, Ulsan National Institute of Science and  
Technology (UNIST), Ulsan, 689-798, Korea

<sup>b</sup>Department of Chemistry and the Beckman Institute, University of Illinois, Urbana, IL 61801, USA

**Supplementary Information**

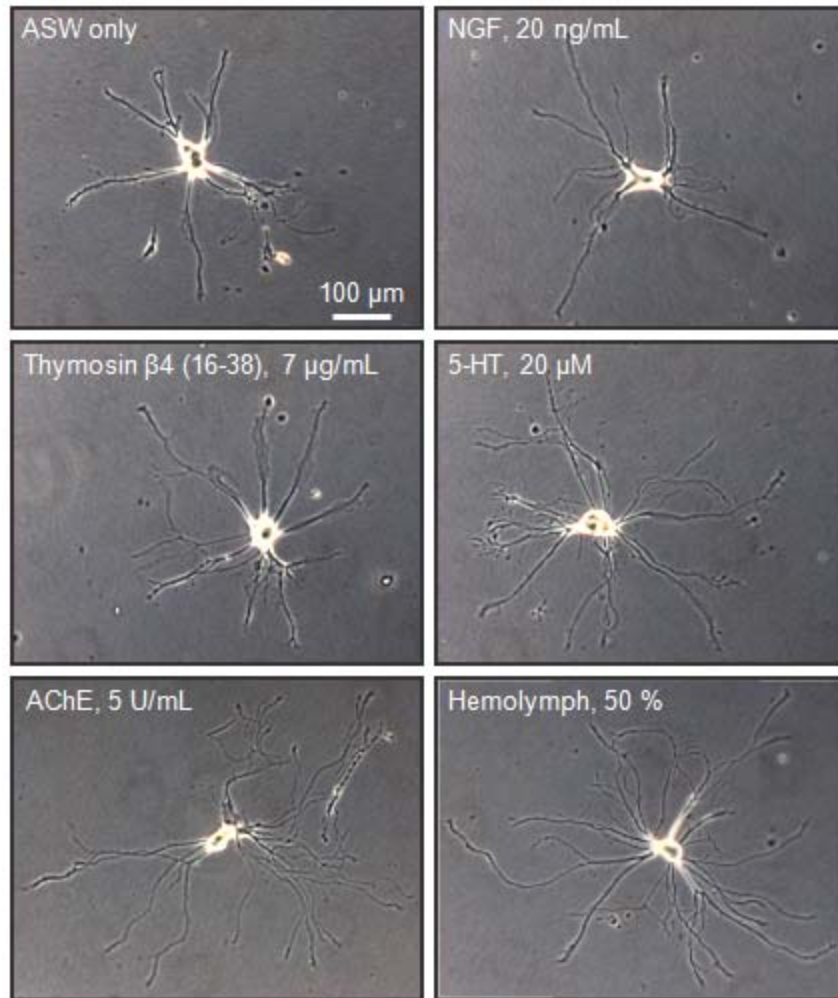

**Figure S1.** Bag cell neurons of *Aplysia californica* cultured in a dish containing ASW supplemented with different factors. Representative images are shown at 2 d *in vitro*. Based on qualitative comparisons between samples, we have chosen AChE and *Aplysia* hemolymph as potential neurotrophic factors in our regeneration studies. We tested nerve growth factor (NGF  $\beta$  human, recombinant, expressed in HEK 293 cells) from Sigma Aldrich, serotonin hydrochloride (5-HT) from Alfa Aesar (Ward Hill, MA) and *Aplysia* thymosin  $\beta$ 4 (16-38, Lys-Leu-Lys-Lys-Thr-Glu-Thr-Gln-Glu-Lys-Asn-Pro-Leu-Pro-Ser-Lys-Glu-Thr-Ile-Glu-Gln-Glu-Lys), which was synthesized by American Peptide Company (Sunnyvale, CA).

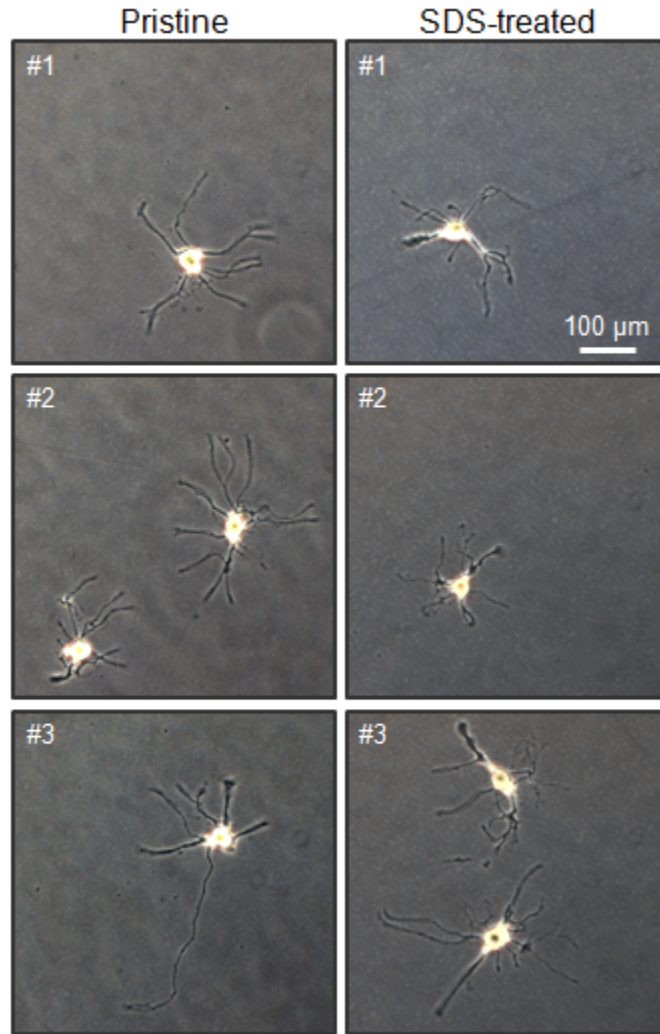

**Figure S2.** *Aplysia* bag cell neurons cultured in ASW on a pristine culture dish (left) and on a dish treated with SDS (right). For the latter, a culture dish was filled with the same solution used for microfluidic transection (i.e. 50/50 mixture of 20 mM SDS and 10 mM Allura dissolved in ASW), and kept for 10 min followed by ASW rinse. The treated dish was refilled with ASW, and cells were plated. Images are shown for three representative cells (#1, #2, and #3) for each case. There is no noticeable negative effect of SDS treatment on the cell viability and outgrowth.
